# Supplementary material for: The impact of pH and temperature on the green gold nanoparticles preparation using Jeju Hallabong peel extract for biomedical applications
Source: Royal Society of Chemistry journal article supplement (doi:10.1039/d4ra00614c), 2024-01-01
Supplement: d4ra00614c1.pdf [file d4ra00614c1.pdf]

## *Supplementary Information*

### Effect of pH and Ambient Temperature on Synthesis of Green Gold Nanoparticles Using Jeju Hallabong Peel Extract as a Friendly Approach for Biomedical Applications

Ariski Ridhola Tri,<sup>‡ab</sup> Kyung Kwan Lee,<sup>‡a</sup> Yongkwan Kim<sup>c</sup> and Chang-Soo Lee<sup>\*ab</sup>

<sup>a</sup>Bionanotechnology Research Center, Korea Research Institute of Bioscience and Biotechnology (KRIBB), Daejeon, 34141, Republic of Korea; ariskiridh@gmail.com (R.T.A); lkk@kribb.re.kr (K.K.L).

<sup>b</sup>Department of Biotechnology, University of Science & Technology (UST), Daejeon 34113, Republic of Korea.

<sup>c</sup>Wildlife Disease Response Team, National Institute of Wildlife Disease Control and Prevention (NIWDC), Gwangju 62407, Republic of Korea; kyk5388@korea.kr (Y.K).

<sup>‡</sup> These authors contributed equally to this paper.

\* Correspondence: cslee@kribb.re.kr.

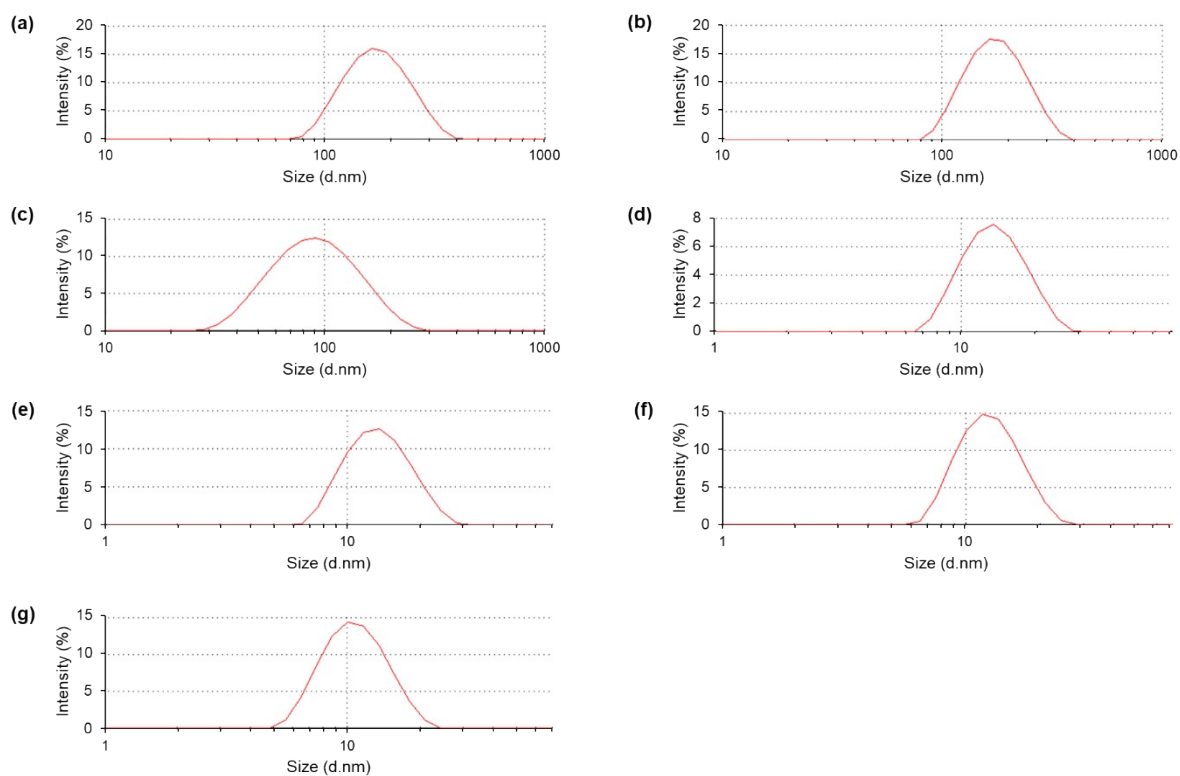

**Figure S1.** Size distribution images of gold nanoparticles (HAuNPs) that were synthesized using HPE. The images depict the size distribution of AuNPs at varying pH levels: (a) pH = 3; (b) pH = 4; (c) pH = 5; (d) pH = 6; (e) pH = 7; (f) pH = 8; (g) pH = 9.

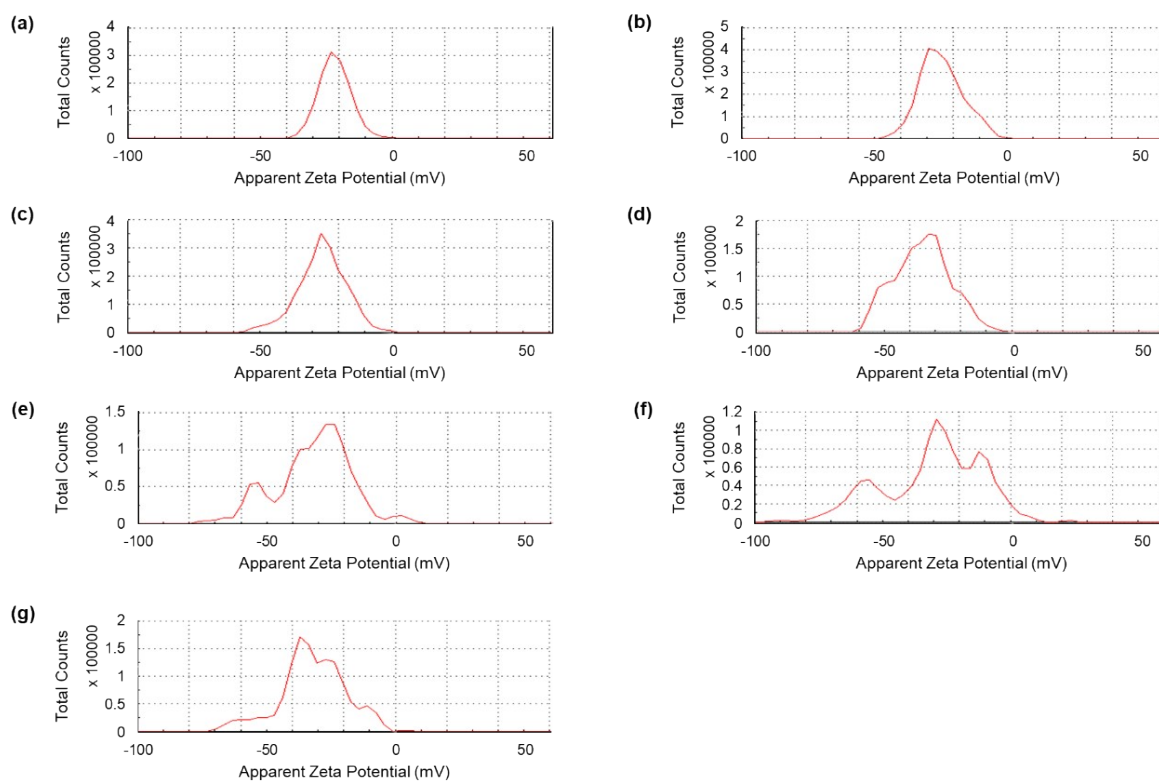

**Figure S2.** The zeta potential values of gold nanoparticles (HAuNPs) synthesized using HPE were measured at various pH levels: (a) pH = 3; (b) pH = 4; (c) pH = 5; (d) pH = 6; (e) pH = 7; (f) pH = 8; (g) pH = 9.

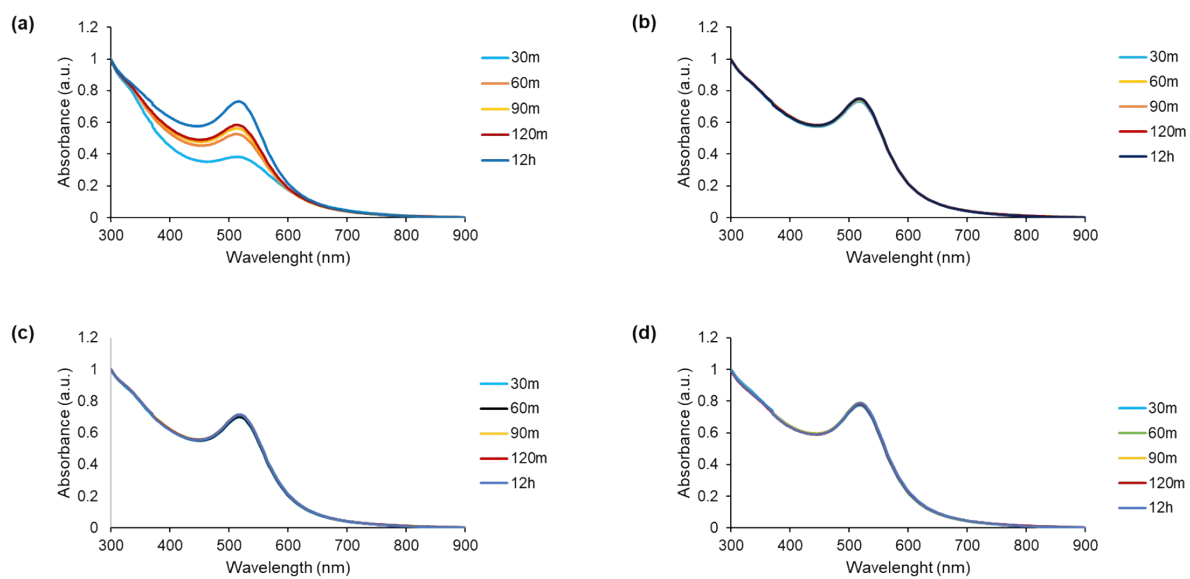

**Figure S3.** The absorbance peak of HAuNPs at pH 9 and temperature reaction at (a)  $T = 30\text{ }^{\circ}\text{C}$ , (b)  $T = 60\text{ }^{\circ}\text{C}$ , (c)  $T = 90\text{ }^{\circ}\text{C}$ , and (d)  $T = 110\text{ }^{\circ}\text{C}$ .

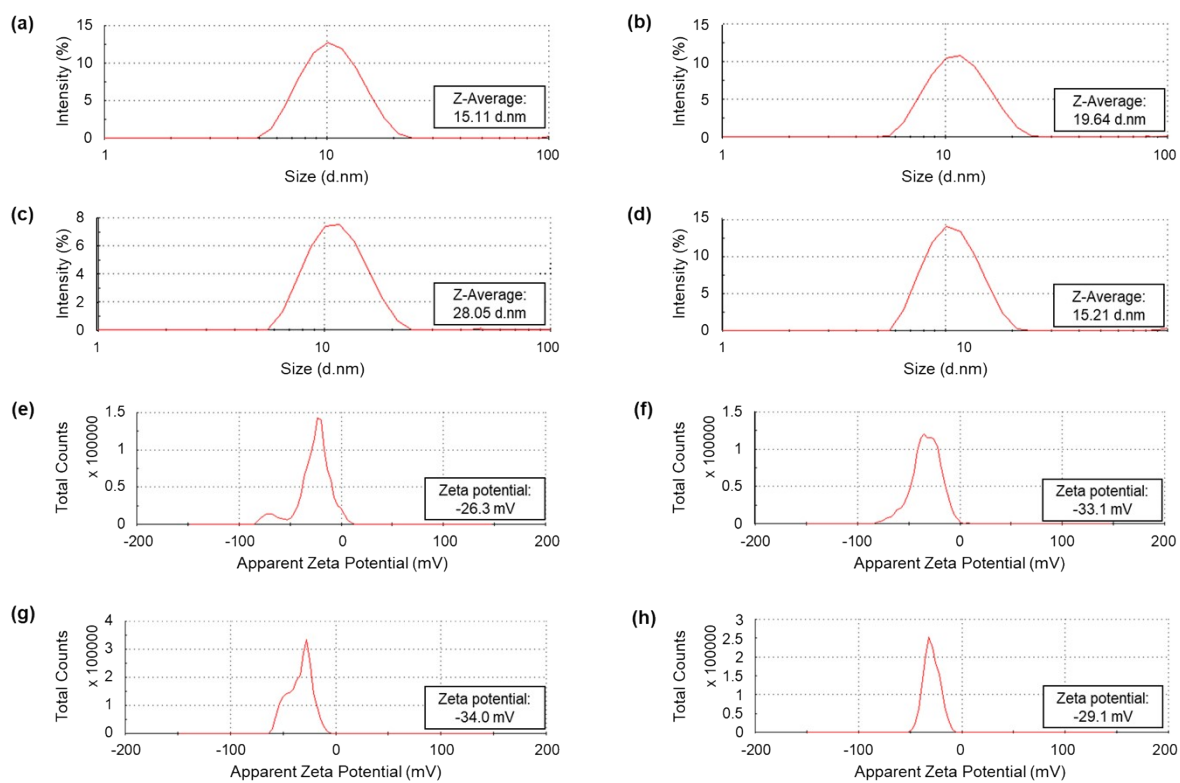

**Figure S4.** Hydrodynamic diameter of HAuNPs at pH 9 and different temperature reactions: (a) T = 30 °C (b) T = 60 °C (c) T = 90 °C and (d) T = 110 °C. Zeta potential of HAuNPs at pH 9 and different temperature reactions: (e) T = 30 °C (f) T = 60 °C (g) T = 90 °C and (h) T = 110 °C.

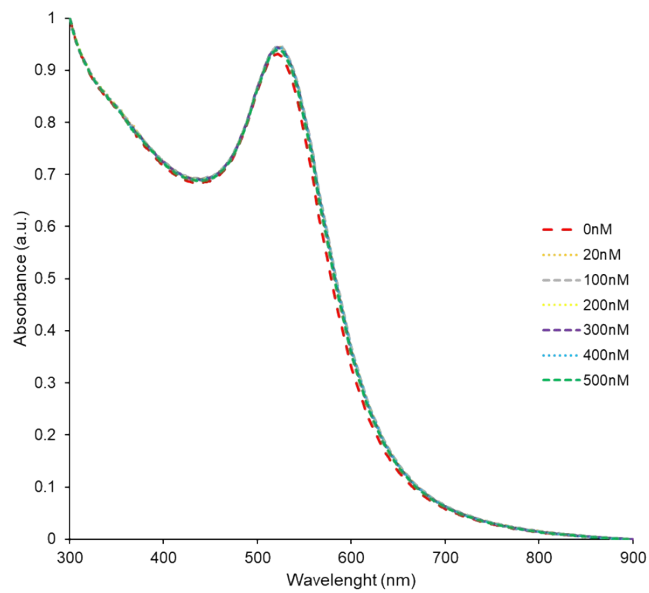

**Figure S5.** Biotinylated-HAuNPs before being treated with Avidin.
